# Supplementary material for: IL-10 Gene Rs1800871, Rs1800872, and Rs1800896 Polymorphisms and IL-10 Serum Levels Association with Pituitary Adenoma
Source: MDPI journal article supplement (doi:10.3390/biomedicines10081921), 2022-08-08
Supplement: s1 [file s1]

Supplementary Materials

# ***IL-10* Gene Rs1800871, Rs1800872, and Rs1800896 Polymorphisms and *IL-10* Serum Levels Association with Pituitary Adenoma**

**Table S1.** Distributions of *IL-10* rs1800871, rs1800872, rs1800896 genotypes and alleles in patients with PA and control groups.

| Gene                        | Genotype/allele | PA (n=106),<br>n (%)     | Control (n=192),<br>n (%) | p-value | p-value<br>HWE |
|-----------------------------|-----------------|--------------------------|---------------------------|---------|----------------|
| <i>IL-10</i><br>(rs1800871) | GG              | 67 (63.2)                | 103 (53.6)                | 0.202   | 0.449          |
|                             | AG              | 32 (30.2)                | 78 (40.6)                 |         |                |
|                             | AA              | 7 (6.6)                  | 11 (5.7)                  |         |                |
|                             | Viso:           | 106 (100)                | 192 (100)                 | 0.238   |                |
|                             | Allele:         |                          |                           |         |                |
|                             | G<br>A          | 166 (78.3)<br>46 (21.7)  | 284 (74.0)<br>100 (26.0)  |         |                |
| <i>IL-10</i><br>(rs1800872) | GG              | 68 (64.2)                | 103 (53.6)                | 0.148   | 0.449          |
|                             | TG              | 31 (29.2)                | 78 (40.6)                 |         |                |
|                             | TT              | 7 (6.6)                  | 11 (5.7)                  |         |                |
|                             | Viso:           | 106 (100)                | 192 (100)                 | 0.190   |                |
|                             | Allele:         |                          |                           |         | 0.554          |
|                             | G<br>T          | 167 (78.8)<br>45 (21.2)  | 284 (74.0)<br>100 (26.0)  |         |                |
| <i>IL-10</i><br>(rs1800896) | TT              | 30 (28.3)                | 49 (25.5)                 | 0.851   | 0.554          |
|                             | TC              | 52 (49.1)                | 100 (52.1)                |         |                |
|                             | CC              | 24 (22.6)                | 43 (22.4)                 |         |                |
|                             | Viso:           | 106 (100)                | 192 (100)                 | 0.767   |                |
|                             | Allele:         |                          |                           |         |                |
|                             | T<br>C          | 112 (52.8)<br>100 (47.2) | 198 (51.6)<br>186 (48.4)  |         |                |

**Table S2.** Binary logistic regression analysis of *IL-10* rs1800871, rs1800872, rs1800896 in patients with PA and control groups.

| <i>IL-10</i> (rs1800871) |                 |             |           |     |
|--------------------------|-----------------|-------------|-----------|-----|
| Model                    | Genotype/allele | OR (95% CI) | p - value | AIC |

|                            |              |                       |       |         |
|----------------------------|--------------|-----------------------|-------|---------|
| Codominant                 | AG vs. GG    | 0.631 (0.377 – 1.054) | 0.079 | 388.697 |
|                            | AA vs. GG    | 0.978 (0.361 – 2.649) | 0.966 |         |
| Dominant                   | AG+AA vs. GG | 0.674 (0.414 – 1.095) | 0.111 | 389.849 |
| Recessive                  | AA vs. GG+AG | 1.163 (0.437 – 3.096) | 0.762 | 386.699 |
| Overdominant               | AG vs. AA+GG | 0.632 (0.381 – 1.047) | 0.075 | 388.204 |
| Additive                   | G            | 0.787 (0.528 – 1.173) | 0.239 | 388.531 |
| <b>IL – 10 (rs1800872)</b> |              |                       |       |         |
| Codominant                 | TG vs. GG    | 0.602 (0.359 – 1.009) | 0.054 | 386.059 |
|                            | TT vs. GG    | 0.964 (0.356 – 2.609) | 0.942 |         |
| Dominant                   | TG+TT vs. GG | 0.647 (0.397 – 1.053) | 0.080 | 389.849 |
| Recessive                  | TT vs. GG+TG | 1.163 (0.437 – 3.096) | 0.762 | 386.064 |
| Overdominant               | TG vs. GG+TT | 0.604 (0.363 – 1.004) | 0.052 | 389.829 |
| Additive                   | G            | 0.766 (0.513 – 1.144) | 0.192 | 386.059 |
| <b>IL – 10 (rs1800896)</b> |              |                       |       |         |
| Codominant                 | TC vs. TT    | 1.177 (0.669 – 2.071) | 0.571 | 391.618 |
|                            | CC vs. TT    | 1.073 (0.588 – 1.959) | 0.818 |         |
| Dominant                   | TC+CC vs. TT | 1.129 (0.702 – 1.814) | 0.617 | 389.938 |
| Recessive                  | CC vs. TT+TC | 1.014 (0.575 – 1.789) | 0.961 | 389.671 |
| Overdominant               | TC vs. TT+CC | 1.152 (0.676 – 1.963) | 0.603 | 389.671 |
| Additive                   | T            | 1.051 (0.785 – 1.408) | 0.738 | 389.618 |

OR: odds ratio; CI: confidence interval; AIC: Akaike information criterion; p-value: significance level (statistically significant when  $p < 0.05$ ).

**Table S3.** Distributions of *IL – 10* rs1800871, rs1800872,rs1800896 genotypes and alleles in patients with PA and control groups by gender.

| Gene                          | Genotype | Males             |                         | P - value | Females            |                          | P - value |
|-------------------------------|----------|-------------------|-------------------------|-----------|--------------------|--------------------------|-----------|
|                               |          | PA (n=46)<br>n(%) | Control (n=63)<br>n (%) |           | PA (n=60)<br>n (%) | Control (n=129)<br>n (%) |           |
| <i>IL – 10</i><br>(rs1800871) | AA       | 3 (6.5)           | 4 (6.3)                 | 0.393     | 4 (6.7)            | 7 (5.4)                  | 0.361     |
|                               | AG       | 16 (34.8)         | 30 (47.6)               |           | 16 (26.7)          | 48 (37.2)                |           |
|                               | GG       | 27 (58.7)         | 29 (46.0)               |           | 40 ( 66.7)         | 74 (57.4)                |           |
|                               | Allele:  |                   |                         | 0.308     |                    |                          | 0.384     |
|                               | A        | 22 (23.9)         | 38 (30.2)               |           | 24 (20.0)          | 62 (24.0)                |           |
| <i>IL – 10</i><br>(rs1800872) | G        | 70 (76.1)         | 88 (69.8)               | 0.276     | 96 (80.0)          | 196 (76.0)               | 0.361     |
|                               | GG       | 28 (60.9)         | 29 (46.0)               |           | 40 (66.7)          | 74 (57.4)                |           |
|                               | TG       | 15 (32.6)         | 30 (47.6)               |           | 16 (26.7)          | 48 (37.2)                |           |
|                               | TT       | 3 (6.5)           | 4 (6.3)                 | 0.229     | 4 (6.7)            | 7 (5.4)                  | 0.384     |
|                               | Allele:  |                   |                         |           |                    |                          |           |
| <i>IL – 10</i><br>(rs1800896) | G        | 71 (77.2)         | 88 (69.8)               | 0.261     | 96 (80.0)          | 196 (76.0)               | 0.306     |
|                               | T        | 21 (22.8)         | 38 (30.2)               |           | 24 (20.0)          | 62 (24.0)                |           |
|                               | CC       | 12 (26.1)         | 9 (14.3)                |           | 12 (20.0)          | 34 (26.4)                |           |
|                               | TC       | 24 (52.2)         | 35 (55.6)               | 0.139     | 28 (46.7)          | 65 (50.4)                | 0.137     |
|                               | TT       | 10 (21.7)         | 19 (30.2)               |           | 20 (33.3)          | 30 (23.3)                |           |
|                               | Allele:  |                   |                         | 0.139     |                    |                          | 0.137     |
|                               | C        | 48 (52.2)         | 53 (42.1)               |           | 52 (43.3)          | 133 (51.6)               |           |
|                               | T        | 44 (47.8)         | 73 ( 57.9)              |           | 68 (56.7 )         | 125 (48.4)               |           |

**Table S4.** Binary logistic regression analysis of *IL – 10* rs1800871, rs1800872, rs1800896 in the PA and control groups by gender.

| Females                    |                 |                       |           |         |
|----------------------------|-----------------|-----------------------|-----------|---------|
| <i>IL – 10</i> (rs1800871) |                 |                       |           |         |
| Model                      | Genotype/allele | OR (95% CI)           | p - value | AIC     |
| Codominant                 | AG vs. GG       | 1.463 (0.891 – 2.402) | 0.132     | 393.069 |
|                            | AA vs. GG       | 1.295 (0.477 – 3.522) | 0.612     |         |
| Dominant                   | AG+AA vs. GG    | 1.439 (0.894 – 2.314) | 0.134     | 391.124 |
| Recessive                  | AA vs. GG+AG    | 1.111 (0.417 – 2.954) | 0.834     | 393.330 |
| Overdominant               | AG vs. AA+GG    | 1.426 (0.878 – 2.316) | 0.151     | 391.322 |
| Additive                   | G               | 1.290 (0.879 – 1.893) | 0.194     | 391.690 |

| <b>IL – 10 (rs1800872)</b> |                 |                       |           |         |
|----------------------------|-----------------|-----------------------|-----------|---------|
| Codominant                 | TG vs. GG       | 0.786 (0.289 – 2.135) | 0.636     | 393.522 |
|                            | TT vs. GG       | 1.105 (0.398 – 3.069) | 0.848     |         |
| Dominant                   | TG+TT vs. GG    | 0.721 (0.448 – 1.160) | 0.178     | 391.559 |
| Recessive                  | TT vs. GG+TG    | 1.111 (0.417 – 2.954) | 0.834     | 393.330 |
| Overdominant               | TG vs. GG+TT    | 1.373 (0.845 – 2.233) | 0.201     | 391.742 |
| Additive                   | G               | 1.259 (0.858 – 1.847) | 0.240     | 391.997 |
| <b>IL – 10 (rs1800896)</b> |                 |                       |           |         |
| Codominant                 | TC vs. TT       | 0.914 (0.521 – 1.604) | 0.754     | 394.238 |
|                            | CC vs. TT       | 0.720 (0.391 – 1.325) | 0.291     |         |
| Dominant                   | TC+CC vs. TT    | 0.821 (0.512 – 1.317) | 0.413     | 392.703 |
| Recessive                  | CC vs. TT+TC    | 0.742 (0.415 – 1.326) | 0.313     | 392.336 |
| Overdominant               | TC vs. TT+CC    | 1.008 (0.591 – 1.719) | 0.977     | 393.373 |
| Additive                   | T               | 0.857 (0.638 – 1.151) | 0.305     | 392.309 |
| <b>Males</b>               |                 |                       |           |         |
| <b>IL – 10 (rs1800871)</b> |                 |                       |           |         |
| Model                      | Genotype/allele | OR (95% CI)           | p - value | AIC     |
| Codominant                 | AG vs. GG       | 0.683 (0.416 – 1.122) | 0.683     | 393.069 |
|                            | AA vs. GG       | 0.772 (0.284 – 2.099) | 0.772     |         |
| Dominant                   | AG+AA vs. GG    | 0.695 (0.432 – 1.118) | 0.134     | 391.124 |
| Recessive                  | AA vs. GG+AG    | 0.900 (0.339 – 2.395) | 0.834     | 393.330 |
| Overdominant               | AG vs. AA+GG    | 0.701 (0.432 – 1.139) | 0.151     | 391.322 |
| Additive                   | G               | 0.775 (0.528 – 1.138) | 0.194     | 391.690 |
| <b>IL – 10 (rs1800872)</b> |                 |                       |           |         |
| Codominant                 | TG vs. GG       | 0.711 (0.433 – 1.168) | 0.178     | 393.522 |
|                            | TT vs. GG       | 0.786 (0.289 – 2.135) | 0.636     |         |
| Dominant                   | TG+TT vs. GG    | 0.721 (0.448 – 1.160) | 0.178     | 391.559 |
| Recessive                  | TT vs. GG+TG    | 0.900 (0.339 – 2.395) | 0.834     | 393.330 |
| Overdominant               | TG vs. GG+TT    | 0.728 (0.448 – 1.184) | 0.201     | 391.742 |
| Additive                   | G               | 0.794 (0.541 – 1.166) | 0.240     | 391.997 |
| <b>IL – 10 (rs1800896)</b> |                 |                       |           |         |
| Codominant                 | TC vs. TT       | 1.094 (0.624 – 1.919) | 0.754     | 394.238 |
|                            | CC vs. TT       | 1.390 (0.755 – 2.559) | 0.291     |         |

|              |              |                       |       |         |
|--------------|--------------|-----------------------|-------|---------|
| Dominant     | TC+CC vs. TT | 1.218 (0.759 – 1.954) | 0.413 | 392.703 |
| Recessive    | CC vs. TT+TC | 1.348 (0.754 – 2.409) | 0.313 | 392.336 |
| Overdominant | TC vs. TT+CC | 0.992 (0.582 – 1.692) | 0.977 | 393.373 |
| Additive     | T            | 1.167 (0.869 – 1.569) | 0.305 | 392.309 |

OR: odds ratio; CI: confidence interval; AIC: Akaike information criteria; p-value: significance level (statistically significant when  $p < 0.05$ ).

**Table S5.** Distributions of *IL – 10* rs1800871, rs1800872,rs1800896 genotypes and alleles in patients with PA and control groups by PA invasiveness.

| Gene                          | Genotype | Control<br>(n=192)<br>n (%) | Non-invasive PA<br>(n=34) n (%) | p - value | Invasive PA<br>(n=71) n (%) | p - value |
|-------------------------------|----------|-----------------------------|---------------------------------|-----------|-----------------------------|-----------|
| <i>IL – 10</i><br>(rs1800871) | AA       | 11 (5.70)                   | 1 (2.9)                         | 0.458     | 6 (8.5)                     | 0.233     |
|                               | AG       | 78 (40.6)                   | 11 (32.4)                       |           | 21 (29.6)                   |           |
|                               | GG       | 103 (53.6)                  | 22 (64.7)                       |           | 44 (62.0)                   |           |
|                               | Allele:  |                             |                                 | 0.224     |                             | 0.512     |
|                               | A        | 100 (26.0)                  | 13 (19.1)                       |           | 33 (23.2)                   |           |
| <i>IL – 10</i><br>(rs1800872) | G        | 284 (74.0)                  | 55 (80.9)                       | 0.458     | 109 (76.8)                  | 0.163     |
|                               | GG       | 103 (53.6)                  | 22 (64.7)                       |           | 45 (63.4)                   |           |
|                               | TG       | 78 (40.6)                   | 11 (32.4)                       |           | 20 (28.2)                   |           |
|                               | TT       | 11 (5.7)                    | 1 (2.9)                         | 0.224     | 6 (8.5)                     | 0.410     |
|                               | Allele:  |                             |                                 |           |                             |           |
| <i>IL – 10</i><br>(rs1800896) | G        | 284 (74.0)                  | 55 (80.9)                       | 0.371     | 110 (77.5)                  | 0.450     |
|                               | T        | 100 (26.0)                  | 13 (19.1)                       |           | 32 (22.5)                   |           |
|                               | CC       | 43 (22.4)                   | 4 (11.8)                        |           | 20 (28.2)                   |           |
|                               | TC       | 100 (52.1)                  | 20 (58.8)                       | 0.269     | 31 (43.7)                   | 0.750     |
|                               | TT       | 49 (25.5)                   | 10 (29.4)                       |           | 20 (28.2)                   |           |
|                               | Allele:  |                             |                                 |           |                             |           |
|                               | C        | 186 (48.4)                  | 28 (41.2)                       |           | 71 (50.0)                   |           |
|                               | T        | 198 (51.6)                  | 40 (58.8)                       |           | 71 (50.0)                   |           |

**Table S6.** Binary logistic regression analysis of *IL – 10* rs1800871, rs1800872, rs1800896 in the PA and control groups by PA invasiveness.

| <i>IL – 10</i> (rs1800871) |                 |                        |           |         |
|----------------------------|-----------------|------------------------|-----------|---------|
| Model                      | Genotype/allele | OR (95% CI)            | p - value | AIC     |
| Non-invasive PA            |                 |                        |           |         |
| Codominant                 | AG vs. GG       | 1.515 (0.693 – 3.308)  | 0.298     | 193.779 |
|                            | AA vs. GG       | 2.350 (0.288 - 19.153) | 0.425     |         |

|                            |                     |                        |       |         |
|----------------------------|---------------------|------------------------|-------|---------|
| Dominant                   | AG+AA <i>vs.</i> GG | 1.584 (0.742 – 3.382)  | 0.234 | 191.958 |
| Recessive                  | AA <i>vs.</i> GG+AG | 2.006 (0.250 - 16.061) | 0.512 | 192.896 |
| Overdominant               | AG <i>vs.</i> AA+GG | 1.431 (0.660 – 3.102)  | 0.365 | 192.566 |
| Additive                   | G                   | 1.521 (0.784 – 2.951)  | 0.215 | 191.780 |
| <b>Invasive PA</b>         |                     |                        |       |         |
| Codominant                 | AG <i>vs.</i> GG    | 1.587 (0.873 – 2.883)  | 0.130 | 307.816 |
|                            | AA <i>vs.</i> GG    | 0.783 (0.273 – 2.250)  | 0.650 |         |
| Dominant                   | AG+AA <i>vs.</i> GG | 1.408 (0.807 – 2.457)  | 0.228 | 307.305 |
| Recessive                  | AA <i>vs.</i> GG+AG | 0.658 (0.234 – 1.852)  | 0.428 | 308.171 |
| Overdominant               | AG <i>vs.</i> AA+GG | 1.629 (0.907 – 2.925)  | 0.102 | 304.018 |
| Additive                   | G                   | 1.163 (0.741 – 1.825)  | 0.513 | 305.816 |
| <b>IL – 10 (rs1800872)</b> |                     |                        |       |         |
| <b>Non-invasive PA</b>     |                     |                        |       |         |
| Codominant                 | TG <i>vs.</i> GG    | 1.515 (0.693 – 3.308)  | 0.298 | 193.779 |
|                            | TT <i>vs.</i> GG    | 2.350 (0.288 - 19.153) | 0.425 |         |
| Dominant                   | TG+TT <i>vs.</i> GG | 1.584 (0.742 – 3.382)  | 0.234 | 191.958 |
| Recessive                  | TT <i>vs.</i> GG+TG | 2.006 (0.250 - 16.061) | 0.512 | 192.896 |
| Overdominant               | TG <i>vs.</i> GG+TT | 1.431 (0.660 – 3.102)  | 0.365 | 192.566 |
| Additive                   | G                   | 1.521 (0.784 – 2.951)  | 0.215 | 191.780 |
| <b>Invasive PA</b>         |                     |                        |       |         |
| Codominant                 | TG <i>vs.</i> GG    | 1.704 (0.932 – 3.115)  | 0.083 | 307.073 |
|                            | TT <i>vs.</i> GG    | 0.801 (0.279 – 2.299)  | 0.680 |         |
| Dominant                   | TG+TT <i>vs.</i> GG | 1.496 (0.854 – 2.618)  | 0.159 | 306.757 |
| Recessive                  | TT <i>vs.</i> GG+TG | 0.658 (0.234 – 1.852)  | 0.428 | 308.171 |
| Overdominant               | TG <i>vs.</i> GG+TT | 1.745 (0.965 – 3.153)  | 0.065 | 305.240 |
| Additive                   | G                   | 1.209 (0.768 – 1.903)  | 0.413 | 308.091 |
| <b>IL – 10 (rs1800896)</b> |                     |                        |       |         |
| <b>Non-invasive PA</b>     |                     |                        |       |         |
| Codominant                 | TC <i>vs.</i> TT    | 0.980 (0.426 – 2.253)  | 0.962 | 193.194 |
|                            | CC <i>vs.</i> TT    | 2.150 (0.694 – 6.665)  | 0.185 |         |
| Dominant                   | TC+CC <i>vs.</i> TT | 1.314 (0.627 – 2.753)  | 0.469 | 192.881 |
| Recessive                  | CC <i>vs.</i> TT+TC | 2.164 (0.723 – 6.483)  | 0.168 | 191.197 |
| Overdominant               | TC <i>vs.</i> TT+CC | 0.822 (0.367 – 1.841)  | 0.634 | 193.189 |

|                    |                     |                       |       |         |
|--------------------|---------------------|-----------------------|-------|---------|
| Additive           | T                   | 1.338 (0.820 – 2.185) | 0.244 | 191.983 |
| <b>Invasive PA</b> |                     |                       |       |         |
| Codominant         | TC <i>vs.</i> TT    | 0.760 (0.393 – 1.466) | 0.412 | 309.182 |
|                    | CC <i>vs.</i> TT    | 0.667 (0.342 – 1.297) | 0.233 |         |
| Dominant           | TC+CC <i>vs.</i> TT | 0.713 (0.412 – 1.233) | 0.226 | 307.301 |
| Recessive          | CC <i>vs.</i> TT+TC | 0.736 (0.396 – 1.366) | 0.331 | 307.847 |
| Overdominant       | TC <i>vs.</i> TT+CC | 0.874 (0.475 – 1.609) | 0.665 | 308.588 |
| Additive           | T                   | 0.812 (0.585 – 1.127) | 0.213 | 307.234 |

OR: odds ratio; CI: confidence interval; AIC: Akaike information criteria; p-value: significance level (statistically significant when  $p < 0.05$ ).

**Table S7.** Distributions of *IL – 10* rs1800871, rs1800872, rs1800896 genotypes and alleles in patients with PA and control groups by PA recurrence.

| Gene                          | Genotype | Control<br>(n=192),<br>n (%) | Without<br>recurrence<br>(n=81), n (%) | p - value | With<br>recurrence<br>(n=21), n (%) | p - value |
|-------------------------------|----------|------------------------------|----------------------------------------|-----------|-------------------------------------|-----------|
| <i>IL – 10</i><br>(rs1800871) | AA       | 11 (5.7)                     | 6 (7.4)                                | 0.226     | 1 (4.8)                             | 0.771     |
|                               | AG       | 78 (40.6)                    | 24 (29.6)                              |           | 7 (33.3)                            |           |
|                               | GG       | 103 (53.6)                   | 51 (63.0)                              |           | 13 (61.9)                           |           |
|                               | Allele:  |                              |                                        | 0.346     |                                     | 0.515     |
|                               | A        | 100 (26.0)                   | 36 (22.2)                              |           | 9 (21.4)                            |           |
|                               | G        | 284 (74.0)                   | 126 (77.8)                             |           | 33 (78.6)                           |           |
| <i>IL – 10</i><br>(rs1800872) | GG       | 103 (53.6)                   | 52 (64.2)                              | 0.159     | 13 (61.9)                           | 0.771     |
|                               | TG       | 78 (40.6)                    | 23 (28.4)                              |           | 7 (33.3)                            |           |
|                               | TT       | 11 (5.7)                     | 6 (7.4)                                |           | 1 (4.8)                             |           |
|                               | Allele:  |                              |                                        | 0.272     |                                     | 0.515     |
|                               | G        | 284 (74.0)                   | 127 (78.4)                             |           | 33 (78.6)                           |           |
|                               | T        | 100 (26.0)                   | 35 (21.6)                              |           | 9 (21.4)                            |           |
| <i>IL – 10</i><br>(rs1800896) | CC       | 43 (22.4)                    | 18 (22.2)                              | 0.878     | 5 (23.8)                            | 0.924     |
|                               | TC       | 100 (52.1)                   | 40 (49.4)                              |           | 10 (47.6)                           |           |
|                               | TT       | 49 (25.5)                    | 23 (28.4)                              |           | 6 (28.6)                            |           |
|                               | Allele:  |                              |                                        | 0.745     |                                     | 0.920     |
|                               | C        | 186 (48.4)                   | 76 (46.9)                              |           | 20 (47.6)                           |           |
|                               | T        | 198 (51.6)                   | 86 (53.1)                              |           | 22 (52.4)                           |           |

**Table S8.** Binary logistic regression analysis of *IL – 10* rs1800871, rs1800872, rs1800896 in the PA and control groups by PA recurrence.

| Model                             | Genotype/allele     | OR (95% CI)            | p - value | AIC     |
|-----------------------------------|---------------------|------------------------|-----------|---------|
| <b><i>IL – 10</i> (rs1800871)</b> |                     |                        |           |         |
| <b>Without recurrence</b>         |                     |                        |           |         |
| Codominant                        | AG <i>vs.</i> GG    | 1.609 (0.912 – 2.838)  | 0.100     | 332.957 |
|                                   | AA <i>vs.</i> GG    | 0.908 (0.318 – 2.594)  | 0.857     |         |
| Dominant                          | AG+AA <i>vs.</i> GG | 1.496 (0.862 – 2.503)  | 0.157     | 331.963 |
| Recessive                         | AA <i>vs.</i> GG+AG | 0.760 (0.271 – 2.129)  | 0.601     | 333.726 |
| Overdominant                      | AG <i>vs.</i> AA+GG | 1.625 (0.931 – 2.837)  | 0.088     | 330.989 |
| Additive                          | G                   | 1.232 (0.797 – 1.905)  | 0.347     | 333.091 |
| <b>With recurrence</b>            |                     |                        |           |         |
| Codominant                        | AG <i>vs.</i> GG    | 1.406 (0.536 - 3.691)  | 0.488     | 140.636 |
|                                   | AA <i>vs.</i> GG    | 1.388 (0.166 - 11.646) | 0.762     |         |
| Dominant                          | AG+AA <i>vs.</i> GG | 1.404 (0.557 - 3.542)  | 0.472     | 138.636 |
| Recessive                         | AA <i>vs.</i> GG+AG | 1.215 (0.149 - 9.912)  | 0.855     | 139.127 |
| Overdominant                      | AG <i>vs.</i> AA+GG | 1.368 (0.528 - 3.545)  | 0.518     | 138.734 |
| Additive                          | G                   | 1.307 (0.594 - 2.879)  | 0.506     | 138.703 |
| <b><i>IL – 10</i> (rs1800872)</b> |                     |                        |           |         |
| <b>Without recurrence</b>         |                     |                        |           |         |
| Codominant                        | TG <i>vs.</i> GG    | 1.712 (0.966 – 3.034)  | 0.066     | 332.228 |
|                                   | TT <i>vs.</i> GG    | 0.926 (0.324 – 2.643)  | 0.885     |         |
| Dominant                          | TG+TT <i>vs.</i> GG | 1.549 (0.907 – 2.647)  | 0.109     | 331.379 |
| Recessive                         | TT <i>vs.</i> GG+TG | 0.760 (0.271 – 2.129)  | 0.601     | 333.726 |
| Overdominant                      | TG <i>vs.</i> GG+TT | 1.725 (0.983 – 3.028)  | 0.057     | 331.248 |
| Additive                          | G                   | 1.276 (0.824 – 1.978)  | 0.275     | 332.772 |
| <b>With recurrence</b>            |                     |                        |           |         |
| Codominant                        | TG <i>vs.</i> GG    | 1.406 (0.536 – 3.691)  | 0.488     | 140.636 |
|                                   | TT <i>vs.</i> GG    | 1.388 (0.166 - 11.646) | 0.762     |         |
| Dominant                          | TG+TT <i>vs.</i> GG | 1.404 (0.557 – 3.542)  | 0.472     | 138.636 |
| Recessive                         | TT <i>vs.</i> GG+TG | 1.215 (0.149 – 9.912)  | 0.855     | 139.127 |
| Overdominant                      | TG <i>vs.</i> GG+TT | 1.368 (0.528 – 3.545)  | 0.518     | 138.734 |
| Additive                          | G                   | 1.307 (0.594 – 2.879)  | 0.506     | 138.703 |

| <b>IL – 10 (rs1800896)</b> |              |                       |       |         |
|----------------------------|--------------|-----------------------|-------|---------|
| <b>Without recurrence</b>  |              |                       |       |         |
| Codominant                 | TC vs. TT    | 0.852 (0.460 – 1.578) | 0.611 | 335.734 |
|                            | CC vs. TT    | 0.956 (0.493 – 1.851) | 0.893 |         |
| Dominant                   | TC+CC vs. TT | 0.898 (0.534 – 1.509) | 0.683 | 333.826 |
| Recessive                  | CC vs. TT+TC | 1.010 (0.541 – 1.885) | 0.975 | 333.992 |
| Overdominant               | TC vs. TT+CC | 0.864 (0.483 – 1.546) | 0.623 | 333.752 |
| Additive                   | T            | 0.962 (0.698 – 1.326) | 0.813 | 333.937 |
| <b>With recurrence</b>     |              |                       |       |         |
| Codominant                 | TC vs. TT    | 0.817 (0.281 – 2.377) | 0.710 | 141.005 |
|                            | CC vs. TT    | 0.860 (0.270 – 2.666) | 0.794 |         |
| Dominant                   | TC+CC vs. TT | 0.836 (0.339 – 2.061) | 0.698 | 139.011 |
| Recessive                  | CC vs. TT+TC | 0.923 (0.320 – 2.665) | 0.883 | 139.141 |
| Overdominant               | TC vs. TT+CC | 0.857 (0.315 – 2.330) | 0.762 | 139.072 |
| Additive                   | T            | 0.916 (0.530 – 1.583) | 0.753 | 139.064 |

OR: odds ratio; CI: confidence interval; AIC: Akaike information criteria; p-value: significance level (statistically significant when  $p < 0.05$ ).

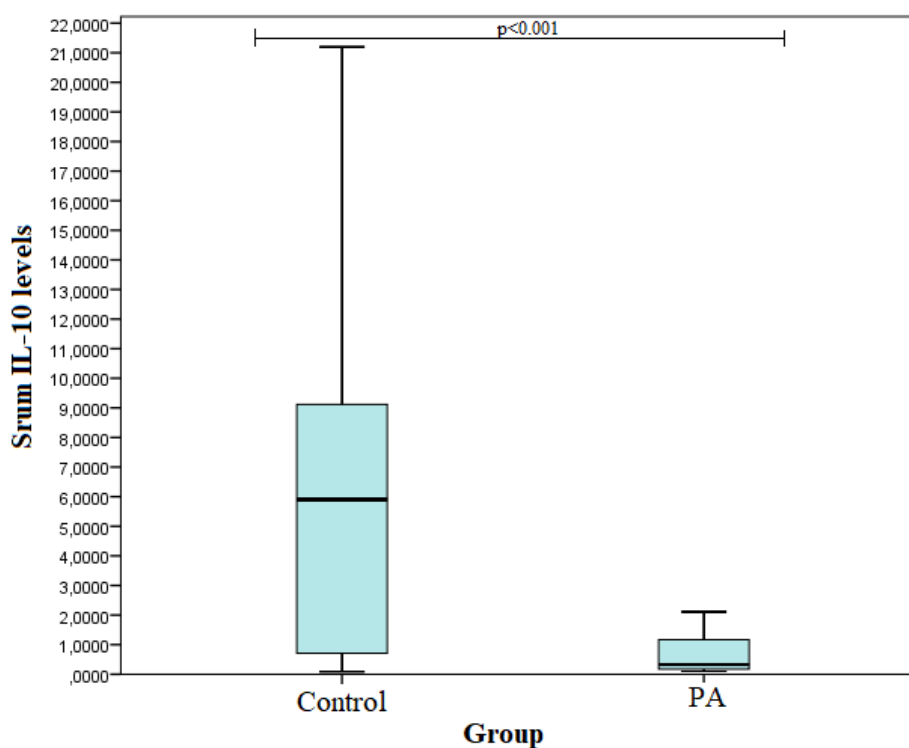

**Figure S1.** Serum IL-10 levels in PA and control groups.

**Table S9.** Associations between *IL-10* haplotypes and risk of pituitary adenoma.

| Haplotype | rs1800871 | rs1800872 | rs1800896 | Frequency (%) |          |       | OR (95% CI)         | p-value |
|-----------|-----------|-----------|-----------|---------------|----------|-------|---------------------|---------|
|           |           |           |           | PA            | Controls | Total |                     |         |
| 1         | G         | G         | C         | 47.17         | 48.08    | 47.75 | 1.00                | ---     |
| 2         | G         | G         | T         | 31.13         | 25.88    | 27.75 | 1.24 (0.83 – 1.86)  | 0.29    |
| 3         | A         | T         | T         | 21.23         | 25.68    | 24.10 | 0.84 (0.54 – 1.29)  | 0.42    |
| rare      | *         | *         | *         | NA            | NA       | 0.40  | 2.02 (0.12 – 33.38) | 0.62    |

OR – odds ratio; CI – confident interval; p – significance level when p=0.05; AIC – Akaike information criteria; NA – not applicable; rare – pooled haplotypes with frequencies <1%.
